# Supplementary material
Source: ML conference proceedings conference paper supplement (https://aclanthology.org/2026.semeval-1.239)
Supplement: SupplementaryMaterial [file system_des.pdf › system_des.pdf]

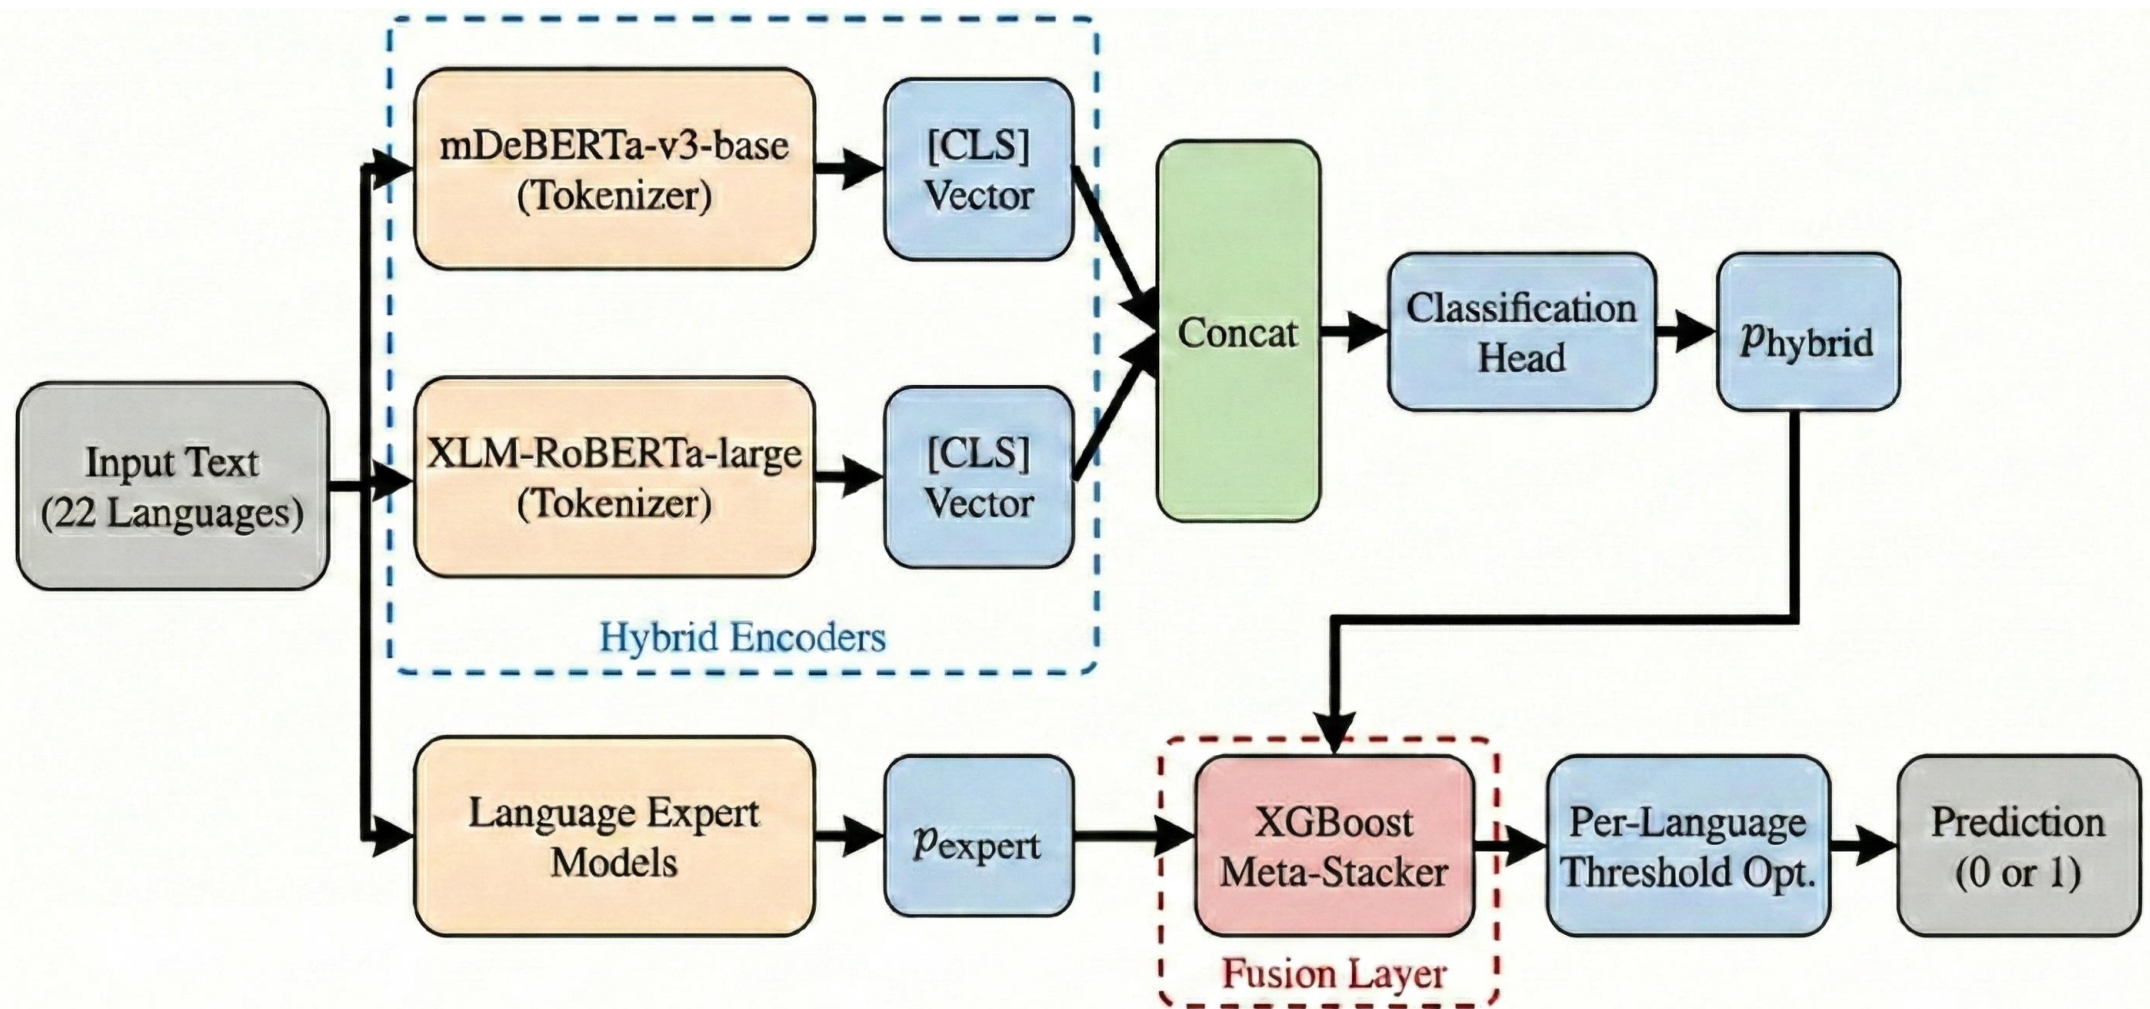

The proposed Multilingual Hybrid Architecture. The system processes input text through parallel pre-trained encoders and expert models, fusing the probabilities via XGBoost Meta-Stacking and per-language threshold.
