# Supplementary material
Source: ML conference proceedings conference paper supplement (https://aclanthology.org/2026.semeval-1.239)

# Data Scarcity vs. System Performance

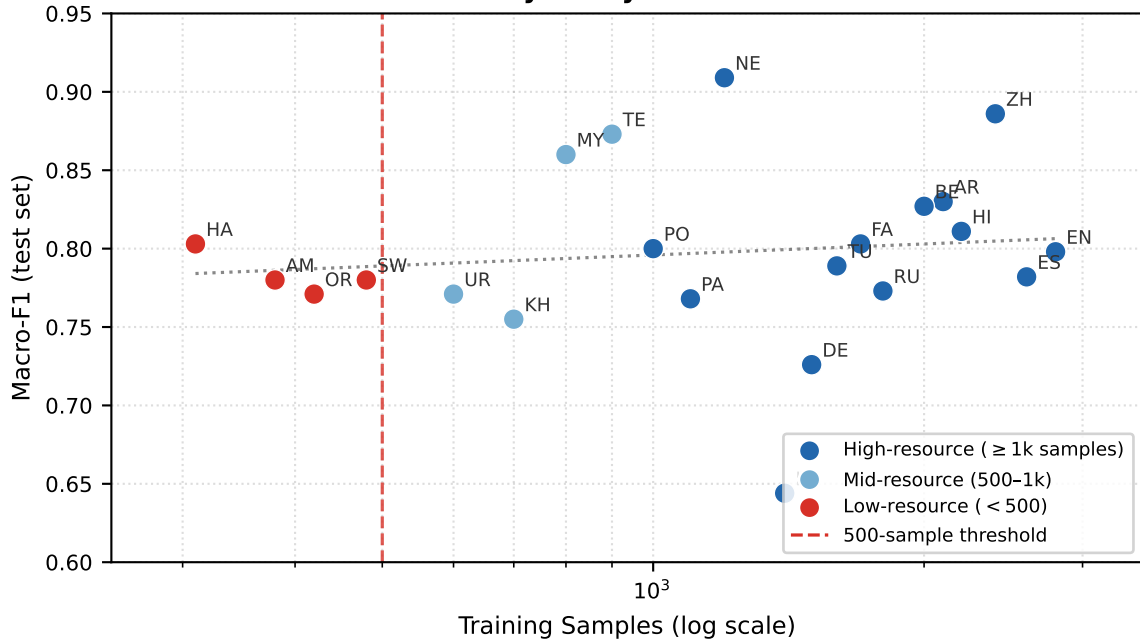

Supplement: SupplementaryMaterial [file data_scarcity.pdf › data_scarcity.pdf]
